# Supplementary material for: Normalization of TAM post-receptor signaling reveals a cell invasive signature for Axl tyrosine kinase
Source: PubMed Central journal article supplement (PMC5011882; doi:10.1186/s12964-016-0142-1), 2016-09-06
Supplement: 12964_2016_142_MOESM1_ESM.pdf [file 12964_2016_142_MOESM1_ESM.pdf]

**Supplementary Table T1**

| <b>List of Primers used in this study</b>                                                                          |                                                                                  |
|--------------------------------------------------------------------------------------------------------------------|----------------------------------------------------------------------------------|
| <b>Primers for nested PCR amplification of cDNA fragments encoding TAMs transmembrane and intracellular domain</b> |                                                                                  |
| <b>1st round</b>                                                                                                   |                                                                                  |
| Tyro3 Forward                                                                                                      | 5'-GTGGACCCTGGAGTCAGCCA-3'                                                       |
| Tyro3 Reverse                                                                                                      | 5'-CTGGAATTCAACAGCTACTGTGTGGCAGTAG-3'                                            |
| Axl Forward                                                                                                        | 5'-GAGCCTCCCAGTACCCCTGG-3'                                                       |
| Axl Reverse                                                                                                        | 5'-GGTGAATTCAGGCACCATCCTCCTGCCC-3'                                               |
| Mer Forward                                                                                                        | 5'-TCCCTGCACACGGTTGGGTA-3'                                                       |
| Mer Reverse                                                                                                        | 5'-CCTGAATTCACATCAGGACCTCTGAGCC-3'                                               |
| <b>2nd round</b>                                                                                                   |                                                                                  |
| Tyro3 Forward                                                                                                      | 5'-CTGGCTAGCAGTGGTCCTTGGTGTGCTAACG-3'                                            |
| Tyro3 Reverse                                                                                                      | 5'-CTGGAATTCAACAGCTACTGTGTGGCAGTAG-3'                                            |
| Axl Forward                                                                                                        | 5'-CTGGCTAGCAGTACTGCTAGGAGCAGTCGTG-3'                                            |
| Axl Reverse                                                                                                        | 5'-GGTGAATTCAGGCACCATCCTCCTGCCC-3'                                               |
| Mer Forward                                                                                                        | 5'-TGTGCTAGCAATCTTTGGCTGCTTTTGTGGA-3'                                            |
| Mer Reverse                                                                                                        | 5'-CCTGAATTCACATCAGGACCTCTGAGCC-3'                                               |
| <b>Primers for PCR amplification of cDNA fragments encoding EGFR extracellular domain</b>                          |                                                                                  |
| EGFR Forward                                                                                                       | 5'-CGGGTACCAGCGATGCGACCCTCCGGGA-3'                                               |
| EGFR Reverse                                                                                                       | 5'-CCAGCTAGCCAGGACGGGATCTTAGGCCATT-3'                                            |
| <b>Primers for PCR amplification of cDNA library</b>                                                               |                                                                                  |
| 5' Adapter                                                                                                         | 5'-GUUCAGAGUUCUACAGUCCGACGAUCNNNN                                                |
| 3' Adapter                                                                                                         | 5'/ 5rApp/ NNNNTGGAATTCTCGGGTGCCAAGG 3ddC/                                       |
| RT Primer                                                                                                          | 5' GCCTTGGCACCCGAGAATTCCA                                                        |
| Forward primer                                                                                                     | 5'AATGATACGGCGACCACCGAGATCTACACGTTTCTACAGTCCGA                                   |
| Reverse primer                                                                                                     | Index CAAGCAGAAGACGGCATAACGAGATCGTGATGTGACTGGAGTTCCTTGGCACCCGAGAATTCCA (barcode) |
| <b>Primers for RT-PCR validation</b>                                                                               |                                                                                  |
| Tmem40 Forward                                                                                                     | 5'-AAGGACGACGAGTTCTTC-3'                                                         |
| Tmem40 Reverse                                                                                                     | 5'-TCGGCGTAGTAGTGGTAG-3'                                                         |
| Spp1 Forward                                                                                                       | 5'-CAGGAAGTTCCACATCTC-3'                                                         |
| Spp1 Reverse                                                                                                       | 5'-CTCCTTGGACTTCATGTG-3'                                                         |
| Myh3 Forward                                                                                                       | 5'-TAGTGCCATTGACATCTTG-3'                                                        |
| Myh3 Reverse                                                                                                       | 5'-TGCTTCTGCTTGAAGTTC-3'                                                         |
| Actb Forward                                                                                                       | 5'-GCATCCACGAACTACAT-3'                                                          |
| Actb Reverse                                                                                                       | 5'-CACTGTGTTGGCATAGAG-3'                                                         |
|                                                                                                                    |                                                                                  |
